# Supplementary material
Source: publisher figshare collection journal article supplement (https://gsajournals.figshare.com/articles/dataset/_/26064079)
Supplement: Supplementary file 1 [file 1]

## Sheet: Sheet 1
batch
